# Supplementary material for: Quantitative prediction of enhancer–promoter interactions
Source: HighWire-hosted journal article supplement (doi:10.1101/gr.249367.119), 2019-12-02
Supplement: Supplemental_Code.zip [file filenames.xlsx]

## Sheet: Лист1
name,filename,source,accession
RNA-seq,K562/RNA-seq/rna-seqPolyA.tsvpre.txt,ENCODE,GSE78561
